# Supplementary material for: Polyampholyte-doped aligned polymer hydrogels as anisotropic electrolytes for ultrahigh-capacity supercapacitors
Source: Royal Society of Chemistry journal article supplement (doi:10.1039/c7ta09616j), 2017-11-24
Supplement: c7ta09616j1.pdf [file c7ta09616j1.pdf]

## Supporting Information

### Polyampholyte-doped Aligned Polymer Hydrogel as Anisotropic Electrolytes for Ultrahigh-Capacity Supercapacitor

*Junjie Wei,<sup>a</sup> Chengyao Yin,<sup>a</sup> Huanlei Wang<sup>b</sup> and Qigang Wang<sup>\*a</sup>*

School of Chemical Science and Engineering, Tongji University

Shanghai 200092 (P. R. China)

E-mail: wangqg66@tongji.edu.cn

#### 1. Materials

Polyacrylamide (PAM, non-ionic, Mw: 2 million-14 million), Acryamide (AAm), Sodium acetate anhydrous (NaAc), Sodium acetate trihydrate (NaAc·3H<sub>2</sub>O), and Polytetrafluoroethylene preparation (PTFE, 60 wt%) were purchased from Aladdin Industrial Co., 2-acrylamido-2-methyl propane sulfonic acid (AMPS) was purchased from Alfa Aesar, (3-methacrylamidipropyl) trimethyl ammonium chloride (MAPTAC) was obtained from Evonik, N,N'-Methylenebisacrylamide (MBAA) was purchased from Shanghai Energy Chemical Co., Ltd. 2,2-Diethoxy Acetophenone (DEAP) was purchased from TCI (Shanghai) Development Co., Ltd. Activated carbon powder (YP80F, 2100 m<sup>2</sup>/g) was purchased from Kuraray Co. Acetylene black was purchased from Shanghai 3F New Material Co., Ltd. Ammonium sulfate ((NH<sub>4</sub>)<sub>2</sub>SO<sub>4</sub>) was purchased from Sinopharm Chemical Reagent Co., Ltd.

## 2. Preparation of hydrogel electrolytes

Typically, the aligned-AAm hydrogel was prepared by the following method: Firstly, 0.75 g AAm, 2.25 mg MBAA, 10uL DEAP were dissolved in 4.25 mL distilled water. Then a certain quality of PAM (0, 20, 40, 60, 80, 100 mg) and 3.5 g NaAc were added to the above solution with continuous stirring at 60 °C for 2 h, forming a precursor solution with high concentration of NaAc and certain concentration of PAM (0.0, 0.4, 0.8, 1.2, 1.6, 2.0 wt%). After cooling to room temperature without any disturbance, a NaAc·3H<sub>2</sub>O crystal as seed was placed on the surface of the above mixture to initiate crystallization of supersaturated NaAc·3H<sub>2</sub>O, forming extensive rod-like “hot ice” template within the mixture (Video 1). Then the hydrogel with template was obtained by UV light polymerization for 30 min. The employed UV lamp of Maxima ML-3500C (Spectronics Corp, USA) with high intensity of 22.4 mw/cm<sup>2</sup> at 365 nm. The template was removed by washing hydrogel with excess distilled water ten times. At last, the hydrogel was soaked in 1 M (NH<sub>4</sub>)<sub>2</sub>SO<sub>4</sub> solution for three days after being sliced in vertical direction with a thickness of 0.3 mm by a blade, and the aligned-AAm gel electrolyte was obtained.

The aligned-PA gel electrolyte was obtained by the same process except replacing 0.75 g AAm with 0.25 g AAm, 0.25 g AMPS and 250 uL MAPTAC.

The non-aligned gel electrolyte was prepared by the following method: 0.75 g AAm, 2.25 mg MBAA, 10uL DEAP were dissolved in 4.25 mL distilled water. Then a certain quality of PAM (0, 20, 40, 60, 80, 100 mg) was added to the above solution with

continuous stirring at room temperature for 2 h, forming a precursor solution with certain concentration of PAM (0.0, 0.4, 0.8, 1.2, 1.6, 2.0 wt%). Then the hydrogel was obtained by UV light polymerization for 30min. At last, the hydrogel was soaked in 1M  $(\text{NH}_4)_2\text{SO}_4$  solution for three days after being sliced with a thickness of 0.3 mm by a blade, and the non-aligned gel electrolyte was obtained.

### **3. Characterizations**

#### **3.1. Optical microscope observation**

The supersaturated precursor solution with certain concentration of PAM was dripped on a glass slide, and initiated to crystallize by a seed crystal at room temperature. The morphology and size of “hot ice” template were observed by optical microscope (AMG EVOS, America).

#### **3.2. SEM Measurement**

The gel sample was freeze-dried by refrigerated drying chamber (Scientz-10N, Ningbo, China) for two days. After that, the sample was sputter-coated with a thin layer of gold. Finally, the scanning electron microscope (Hitachi S-4800, JEOL, Tokyo, Japan) was employed to observe the surface structure of the samples at a voltage of 3 kV.

#### **3.3. Rheological Measurement**

The intrinsic viscosity of the precursor solution without NaAc was measured by Thermo Haake Rheostress RS6000 rheometer (Thermo Scientific, Karlsruhe, Germany) at 25 °C. Steady rheological behaviors were performed ranging from 1 to

300 1/s. With the increase of PAM concentration from 0 wt% to 4 wt%, the intrinsic viscosity increases from 0.035 to 20.8 Pas.

### **3.4. Swollen Measurement**

There is a swelling behavior when hydrogel is immersed in water. In order to evaluate it, the maximum swollen ratio was measured. Briefly, a non-aligned hydrogel with a known volume ( $V_0$ ) was kept in distilled water, and measured the volume at intervals ( $V_t$ ). The swollen ratio ( $\varepsilon$ ) is defined as  $\varepsilon = (V_t - V_0)/V_0$ . After three days, the hydrogel reached maximum swollen ratio of 1.68.

### **3.5. FTIR measurement**

The freeze-dried aligned-AAm gel and aligned-PA gel were measured by a Thermo Scientific Nicolet IS10 FTIR spectrometer in the wavenumbers range of 4000 to 400  $\text{cm}^{-1}$  with KBr powder in a resolution of 0.4  $\text{cm}^{-1}$ .

### **3.6. Mechanical measurement**

The compressive stress-strain properties of hydrogel were measured by an electronic universal testing machine (UTM2502, Shenzhen Suns Technology CO., LTD.). The compressive test of the cylindrical samples, 13 mm in diameter and 6-10 mm in thickness, were carried out at the speed of 1 mm/min with 95% strain. And the compression recovery test was performed at a speed of 0.5 mm/min with 90% strain.

### **3.7. Ionic conductivity measurement**

The ionic conductivity of hydrogel electrolytes were measured by AC impedance technique. In this experiment, the cylindrical electrolyte samples were sandwiched between two stainless steel electrodes and firm contact was ensured. The measurements

were carried out by Metrohm Autolab PGSTA302N (The Netherlands) in the frequency range of 100 kHz to 10 Hz at room temperature. The intersection of the curve at the real part is taken as the bulk resistance of the hydrogel electrolyte ( $R_b$ ), and the ionic conductivity of the sample is calculated according to the following equation:

$$\sigma = \frac{L}{AR_b} \quad [\text{Equation S1}]$$

where  $L$  is the thickness of the hydrogel electrolyte and  $A$  is the electrode area.<sup>1</sup>

## **4. Electrochemical performances of solid state supercapacitors**

### **4.1. Preparation of electrodes**

The commercial activated carbon (YP 80F) was selected to prepare the electrodes of solid state supercapacitors as active material. Typically, the porous electrodes were prepared with a slurry mixture of activated carbon powder, PTFE binder (60%), and acetylene black (with a w/w ratio of 8:1:1). Then the mixture was spread on a titanium stainless steel collector. At last, the electrodes with mass loading of about 4 mg/cm<sup>2</sup> were obtained after being dried in a vacuum at 120 °C for 24 h.

### **4.2. Fabrication and characterization of solid state supercapacitors**

The solid state supercapacitors were fabricated with the commercial activated carbon and hydrogel electrolytes. The cyclic voltammetry, chronopotentiometry and AC impedance measurements were measured by the Metrohm Autolab PGSTA302N coupled with a computer at room temperature. The cyclic voltammetry and galvanostatic charge–discharge curves were carried out at different scan rates and current densities, respectively. The cycling stability of the supercapacitors was

performed at room temperature with a sweep charge and discharge rate at the current density of 1 A·g<sup>-1</sup> for 10000 cycles by LAND CT2001A (Wuhan LAND Electronics CO., LTD).

The specific capacitance of the supercapacitor can be calculated from the cyclic voltammogram curves:

$$C_s = \frac{2S}{mv\Delta U} \quad [\text{Equation S2}]$$

Where  $C_s$  is the specific capacitance,  $S$  is enclosed area of curves,  $m$  is the active material mass of the electrode,  $v$  is the potential scan rate,  $\Delta U$  is the potential window.

$C_s$  can also be calculated from the galvanostatic charge–discharge curves:

$$C_s = \frac{4I\Delta t}{m\Delta U} \quad [\text{Equation S3}]$$

Where  $I$  is the discharge current,  $\Delta t$  is the discharge time,  $m$  is the active material mass of the electrode,  $\Delta U$  is the voltage after  $IR$  drop.<sup>2</sup>

The energy density and power density are calculated using the following equations:

$$E = \frac{C_s \Delta U^2}{8} \quad [\text{Equation S4}]$$

$$P = \frac{E}{\Delta t} \quad [\text{Equation S5}]$$

Where  $E$  is the energy density,  $C_s$  is the specific capacitance calculated from Equation S3,  $\Delta U$  is the voltage after  $IR$  drop,  $P$  is power density and  $\Delta t$  is the discharge time.<sup>3</sup>

## References

- [1] Liu, X. H.; Wu, D. B.; Wang, H. L.; Wang, Q. G., *Adv Mater* **2014**, 26 (25), 4370-4375.
- [2] Yang, P. H.; Mai, W. J., *Nano Energy* **2014**, 8, 274-290.
- [3] Kang, Y. J.; Chun, S. J.; Lee, S. S.; Kim, B. Y.; Kim, J. H.; Chung, H.; Lee, S. Y.; Kim, W., *Acs Nano* **2012**, 6 (7), 6400-6406.

## 5. Figures

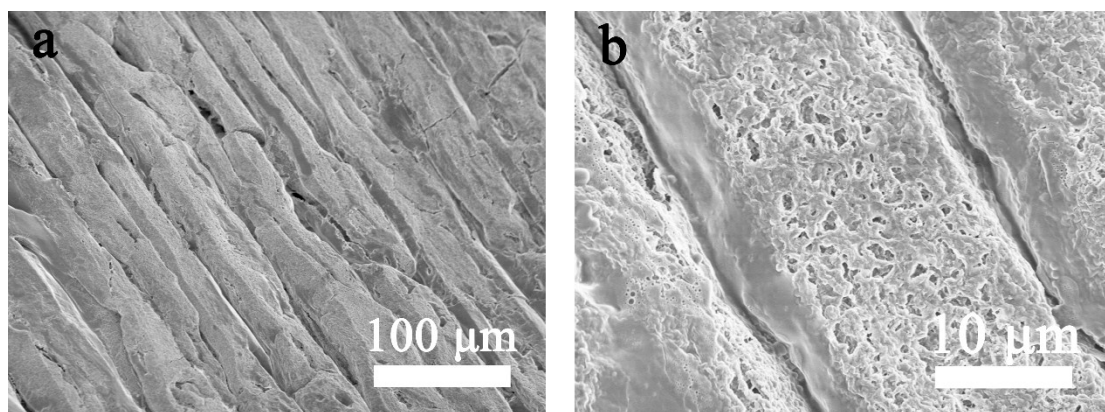

Fig.S1 SEM images of aligned NaAc·3H<sub>2</sub>O crystal within freeze-dried gel.

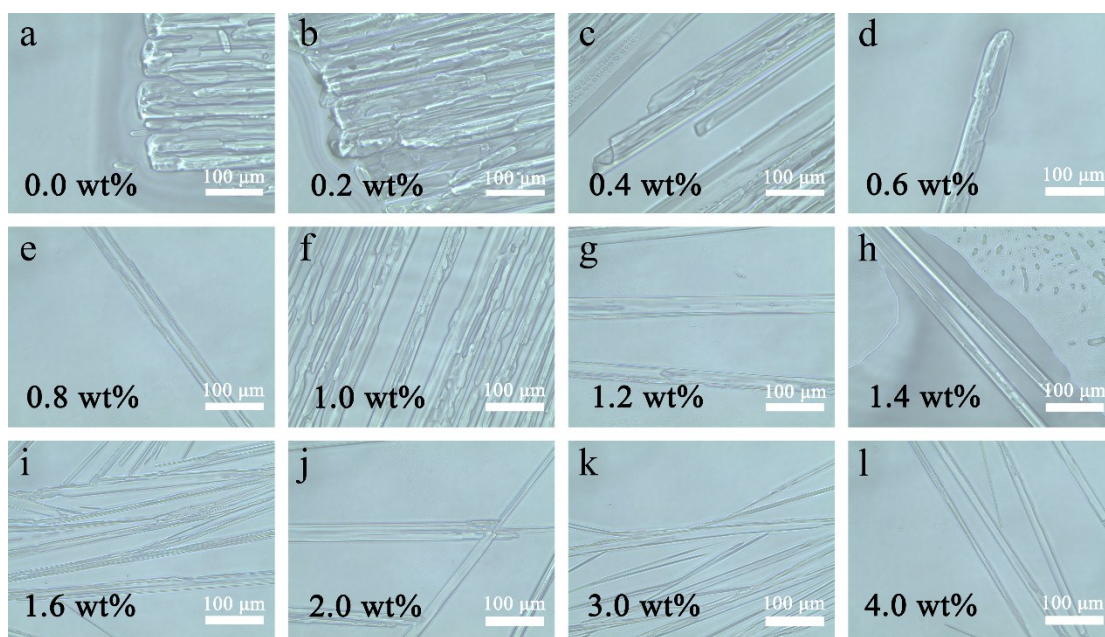

Fig.S2 Optical microscope images of the aligned NaAc·3H<sub>2</sub>O crystals.

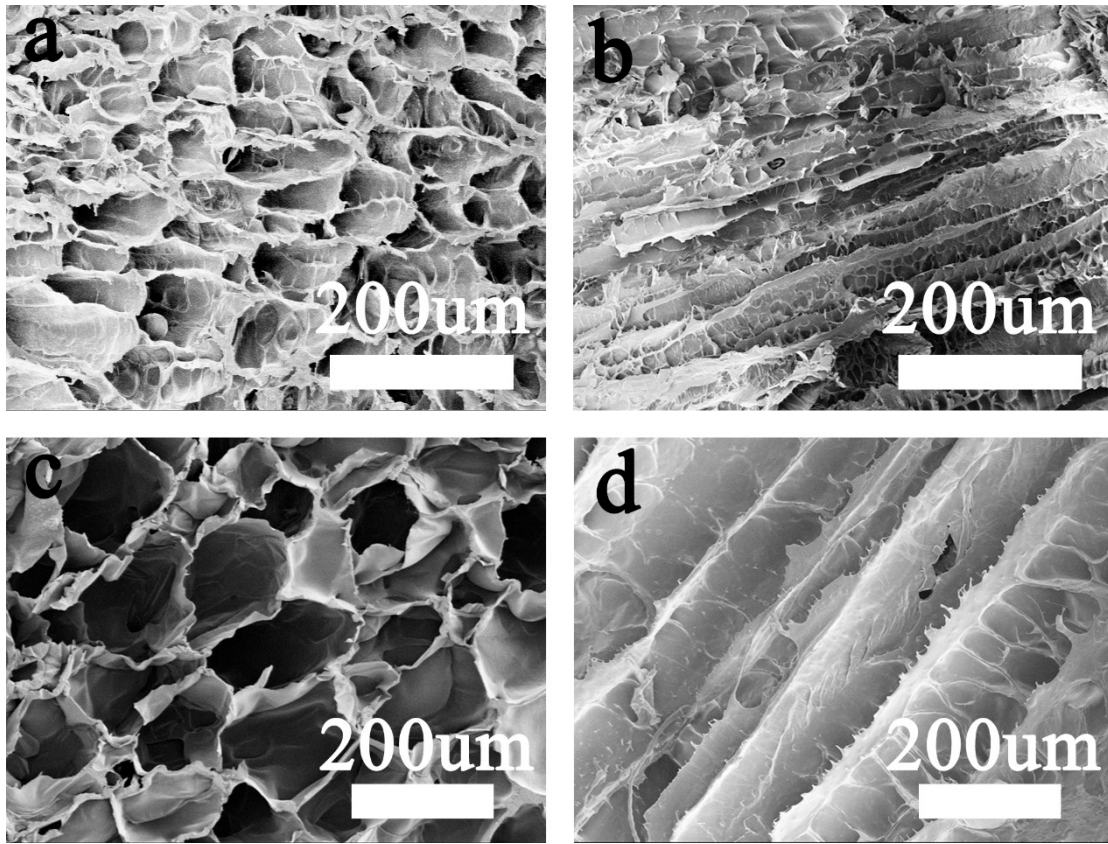

Fig.S3 (a) SEM image of the aligned pores within aligned-AAm-2 wt% gel at vertical-pore direction. (b) SEM image of the aligned pores within aligned-AAm-2 wt% hydrogel at parallel-pore direction. (c) SEM image of the aligned pores within aligned-AAm-0 wt% hydrogel at vertical-pore direction. (d) SEM image of the aligned pores within aligned-AAm-0 wt% hydrogel at parallel-pore direction.



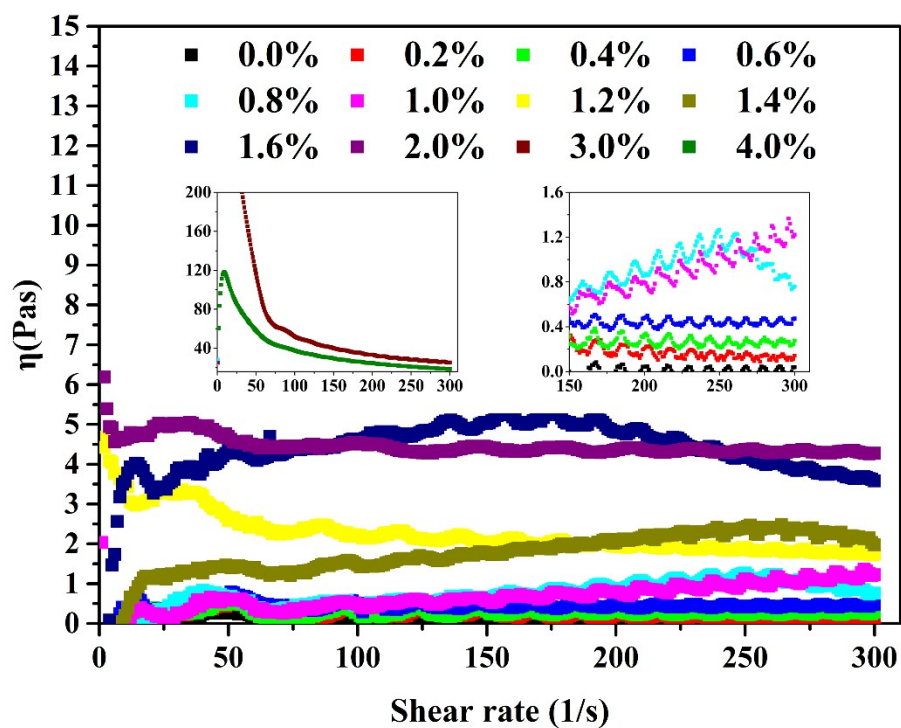

Fig.S4 The intrinsic viscosity of the precursor solution with different PAM concentration (0 wt%-4 wt%).

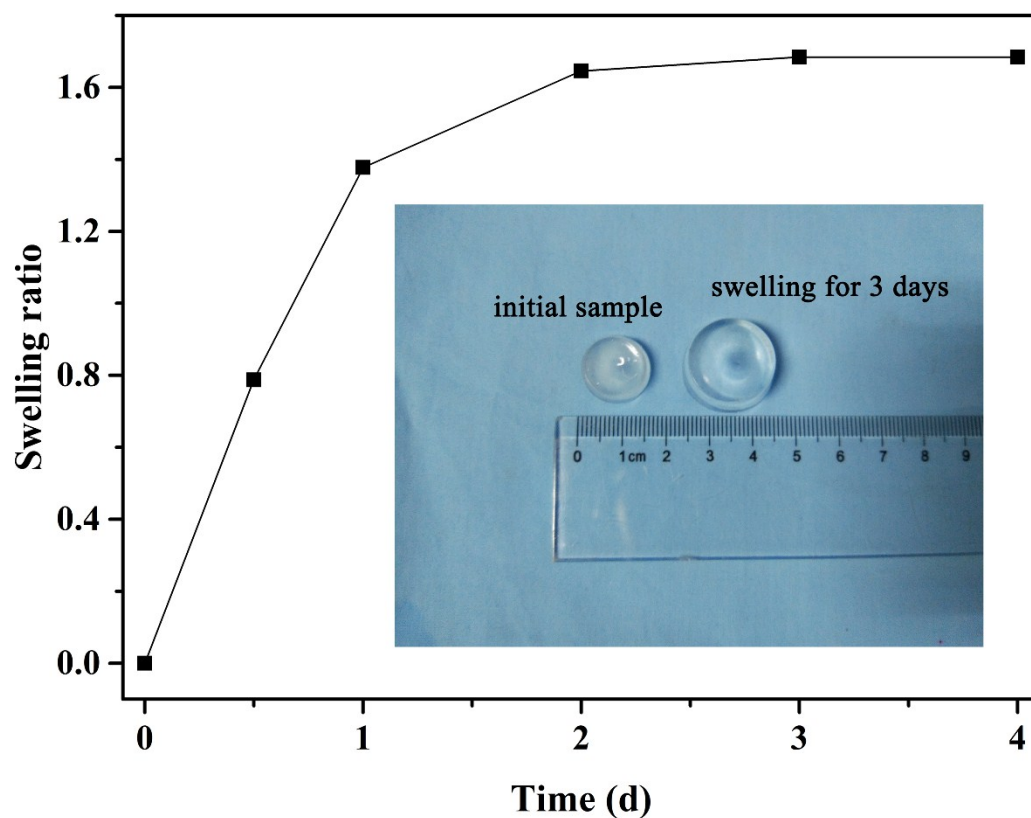

Fig.S5 The swelling behavior of the non-aligned-2 wt% hydrogel. Insert: the contrast of original hydrogel and the hydrogel immersing for 3 days.

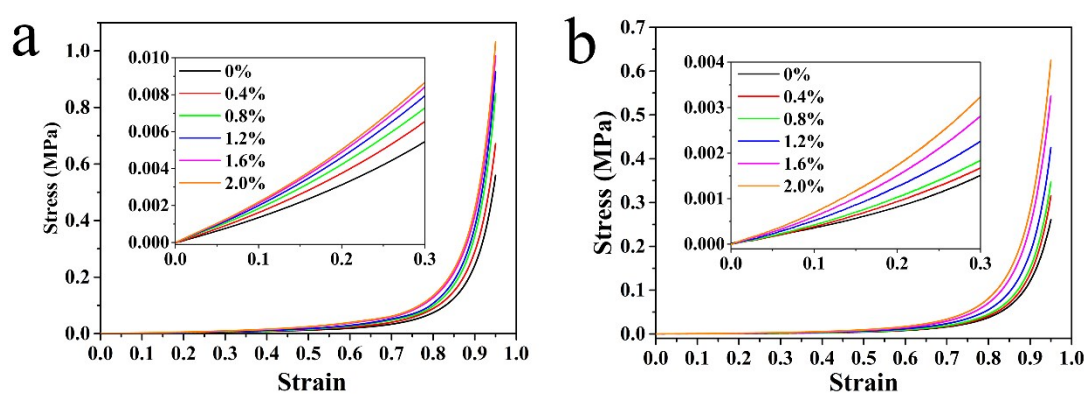

Fig.S6 (a) Compressive curves of the non-aligned hydrogel with different PAM contents. (b) Compressive curves of the aligned-AAM hydrogel with different PAM contents.

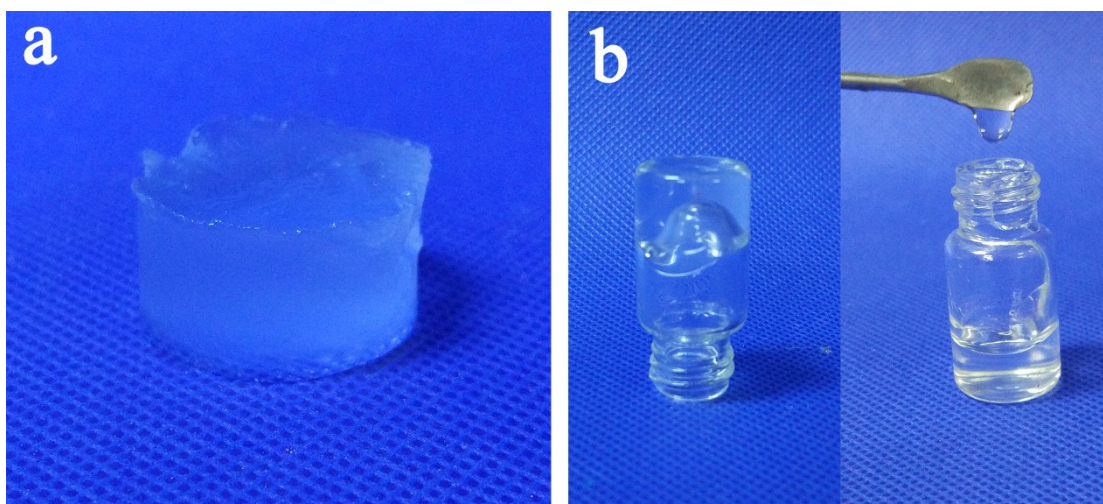

Fig.S7 (a) Photo of aligned-PA hydrogel. (b) Photo of PVA/H<sub>3</sub>PO<sub>4</sub> gel.

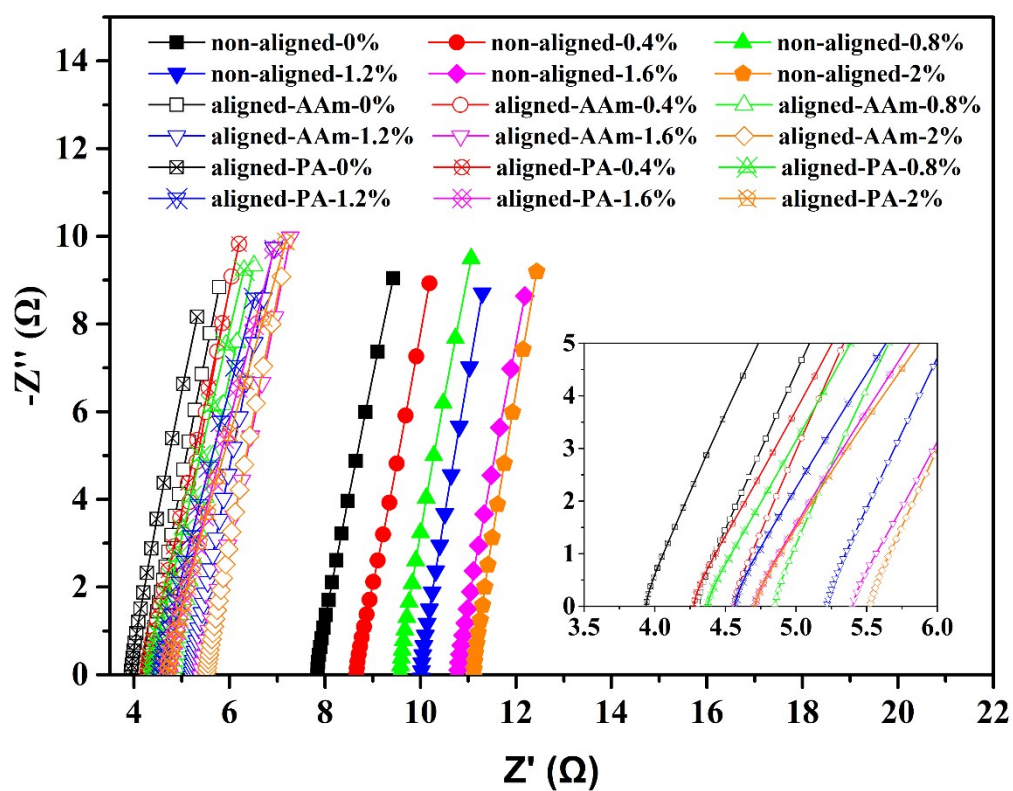

Fig.S8 The frequency dependent impedance plots of gel electrolytes with different structure.

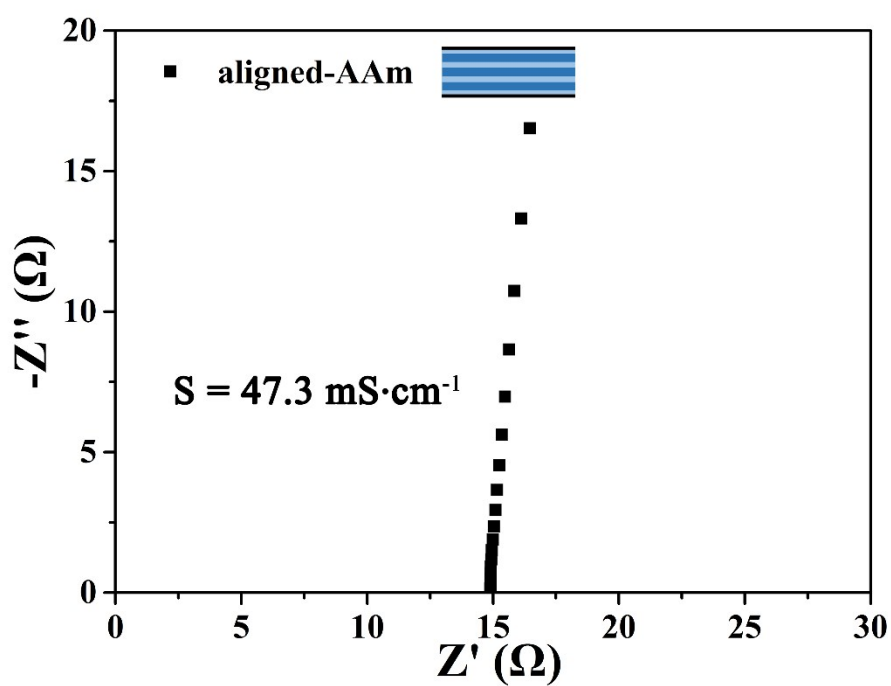

Fig.S9 The frequency dependent impedance plots and ionic conductivity of aligned-AAm-0 wt% gel electrolytes at parallel direction with size of  $10 \times 10 \times 7 \text{ mm}$ .

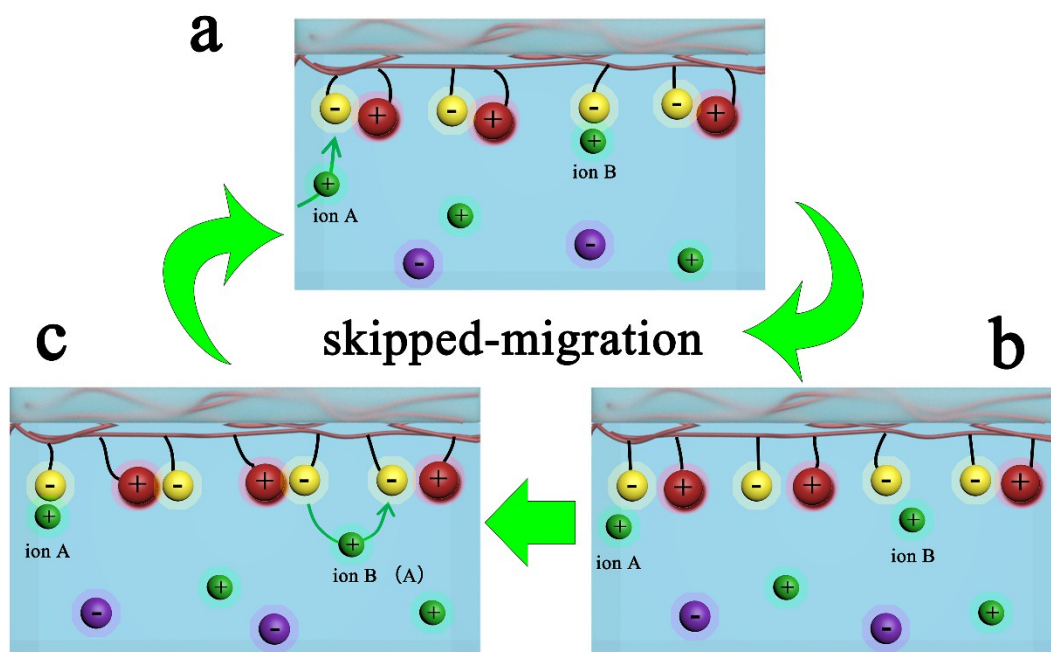

Fig.S10 Schematic of skipped-migration. (a) A free ion A is close to the ion pair of amphoteric groups on the polymer chain. (b) The primal charge balance is destroyed. (c) New balance is formed through the charge redistribution, and a new free ion B is released in the distance and next cycle is triggered simultaneously.

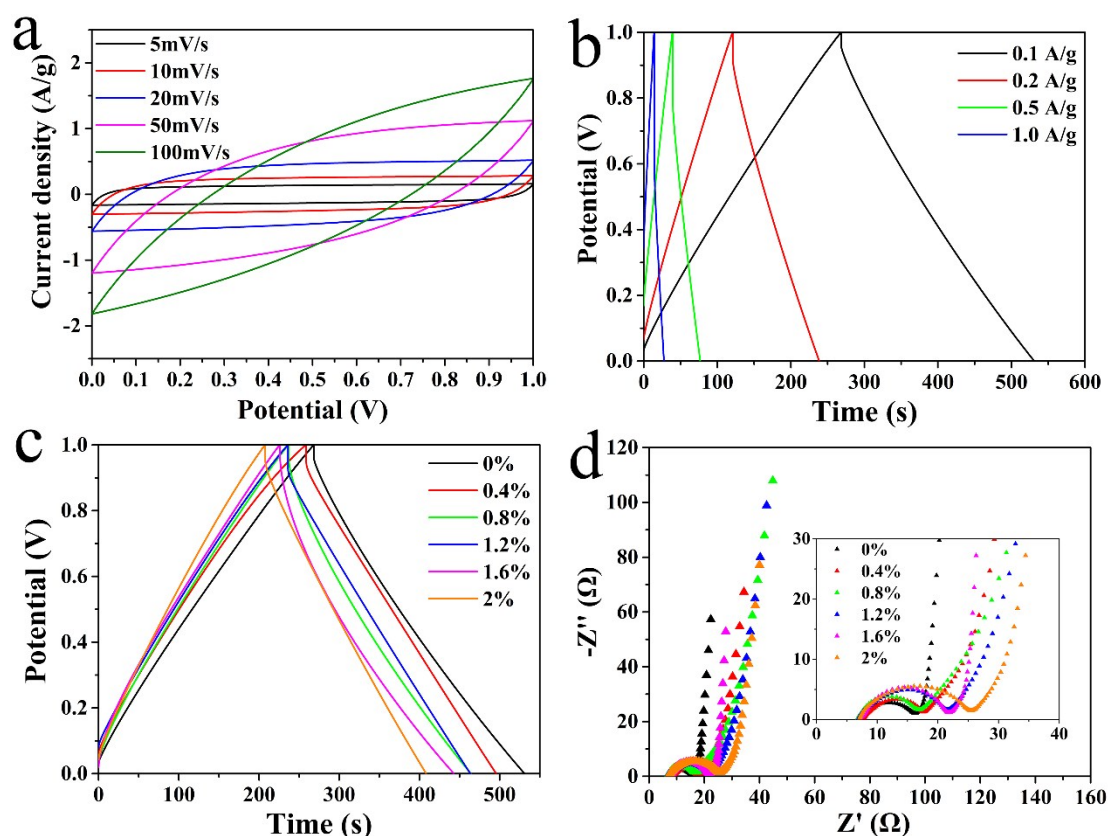

Fig.S11 (a) Cyclic voltammetry curves of non-aligned-0 wt% based supercapacitor at scan rate from  $5 \text{ mV} \cdot \text{s}^{-1}$  to  $100 \text{ mV} \cdot \text{s}^{-1}$ . (b) Galvanostatic charge-discharge curves of the non-aligned-0 wt% based supercapacitor at current density from  $0.1$  to  $1.0 \text{ A} \cdot \text{g}^{-1}$ . (c) Galvanostatic charge-discharge curves of non-aligned based supercapacitors with different PAM concentration at  $0.1 \text{ A} \cdot \text{g}^{-1}$ . (d) The Nyquist plots of non-aligned based supercapacitors with different PAM concentration.



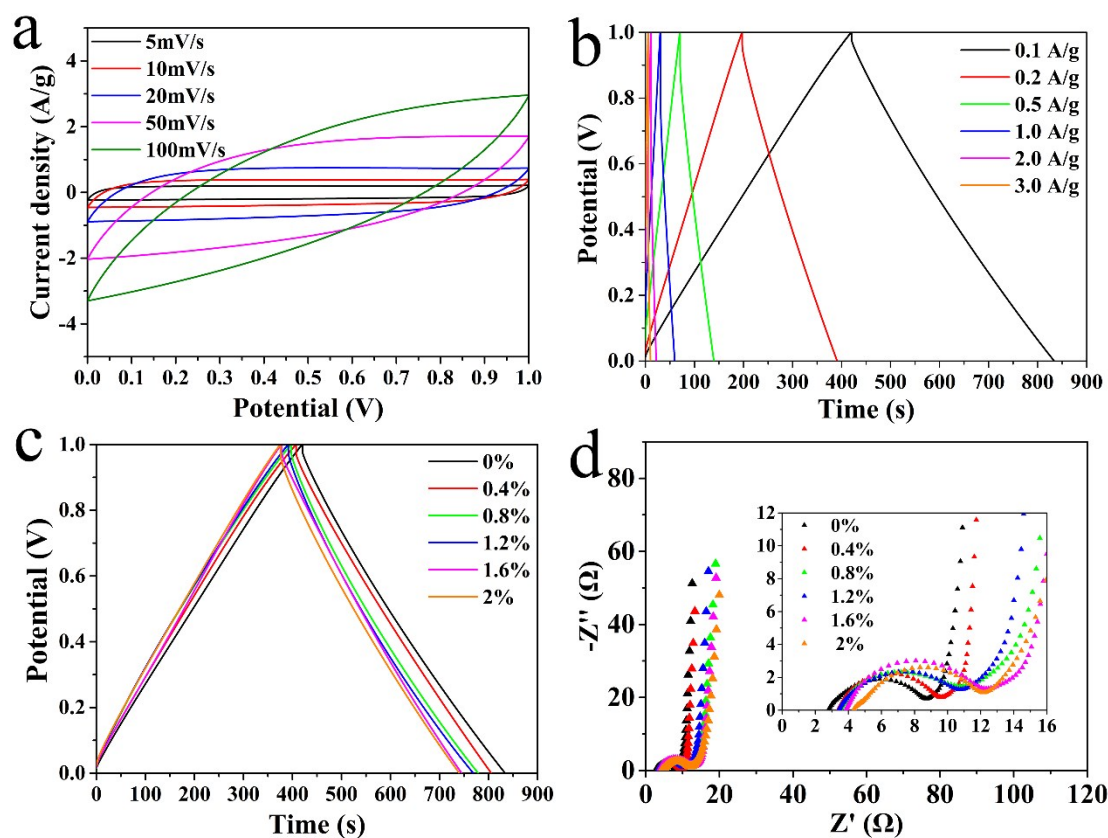

Fig.S12 (a) Cyclic voltammetry curves of aligned-AAm-0 wt% based supercapacitor at scan rate from  $5 \text{ mV} \cdot \text{s}^{-1}$  to  $100 \text{ mV} \cdot \text{s}^{-1}$ . (b) Galvanostatic charge-discharge curves of the aligned-AAm-0 wt% based supercapacitor at current density from  $0.1$  to  $1.0 \text{ A} \cdot \text{g}^{-1}$ . (c) Galvanostatic charge-discharge curves of aligned-AAm based supercapacitors with different PAM concentration at  $0.1 \text{ A} \cdot \text{g}^{-1}$ . (d) The Nyquist plots of aligned-AAm based supercapacitors with different PAM concentration.

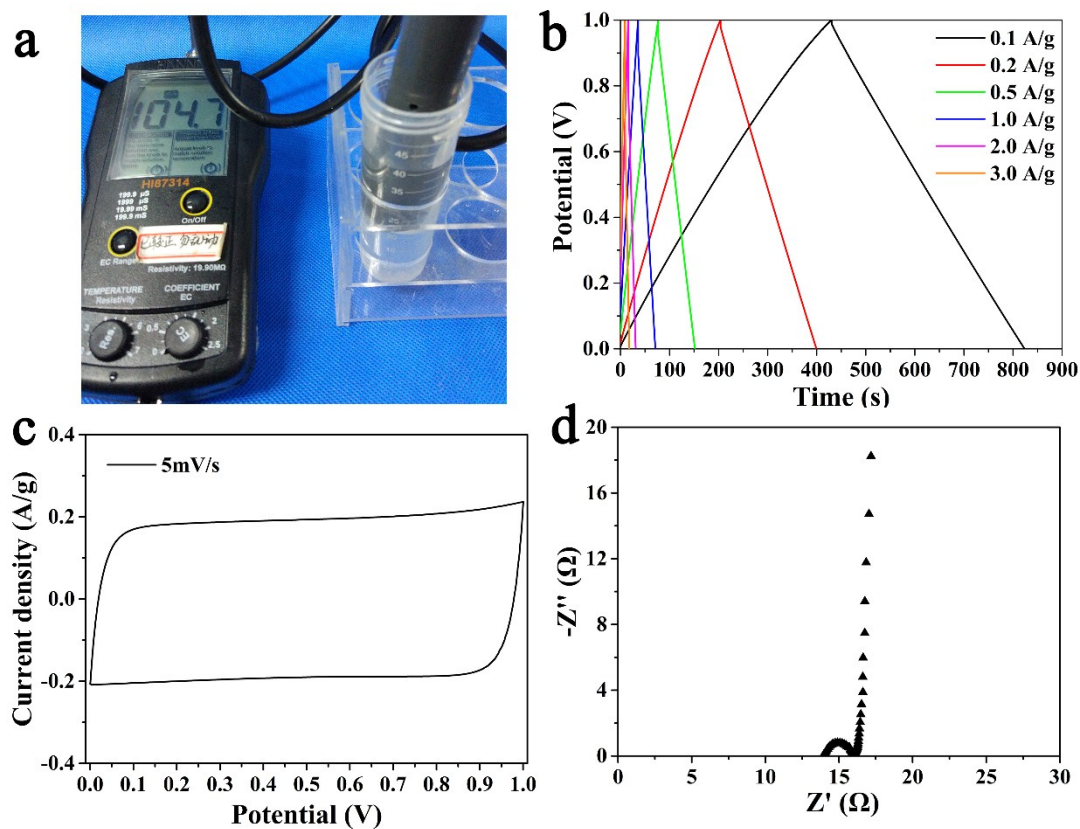

Fig.S13 (a) Ionic conductivity of 1 M  $(\text{NH}_4)_2\text{SO}_4$  solution. (b) Galvanostatic charge–discharge curves of the liquid electrolyte based supercapacitor at current density from 0.1 to 3.0  $\text{A} \cdot \text{g}^{-1}$ . (c) Cyclic voltammetry curve of liquid electrolyte based supercapacitor at 5  $\text{mV} \cdot \text{s}^{-1}$ . (d) The Nyquist plots of liquid electrolyte based supercapacitor.

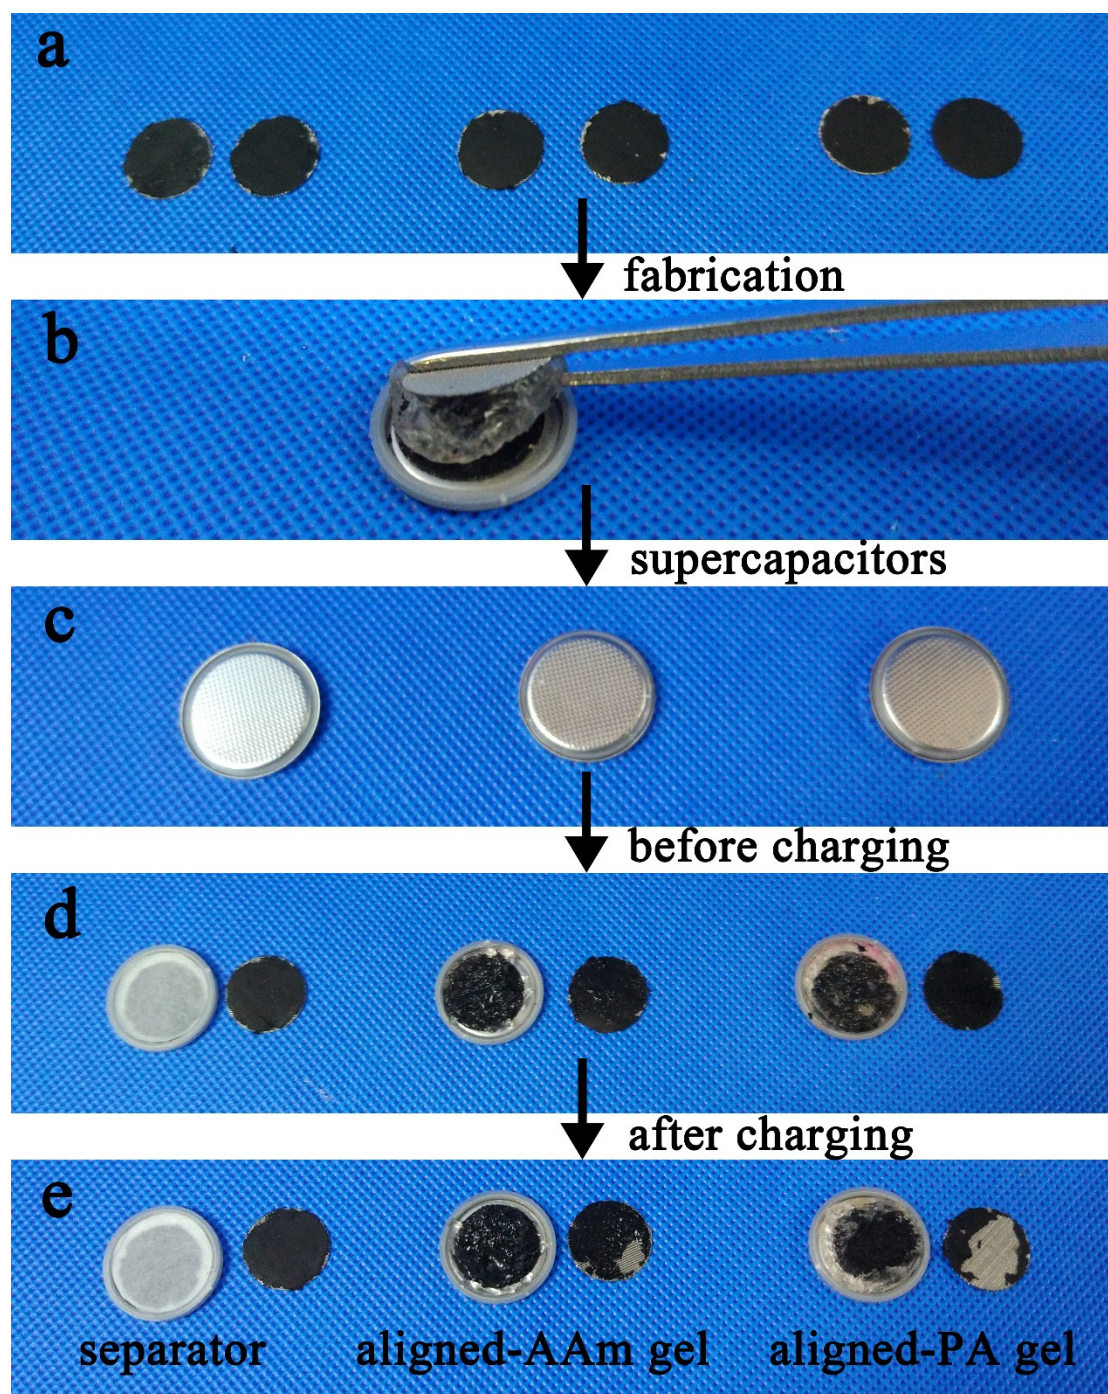

Fig.S14 Adhesion test. (a)The electrodes before fabricating with electrolytes. (b) The fabrication process. (c) The supercapacitors. (d) The electrodes of supercapacitors before charging. (e) The electrodes of supercapacitors after charging.
